# Supplementary material for: Angiotensin II Receptor Blocker Associated With Less Outcome Risk in Patients With Acute Kidney Disease
Source: PubMed Central journal article supplement (PMC9065477; doi:10.3389/fphar.2022.714658), 2022-04-20

**Supplementary Figure 1.**

Standardized differences of baseline covariates before and after the 1:1 propensity score matching in ACEi vs. ARB user (A), and ACEi/ARB vs. other HTN drug-user (B)  
(A)

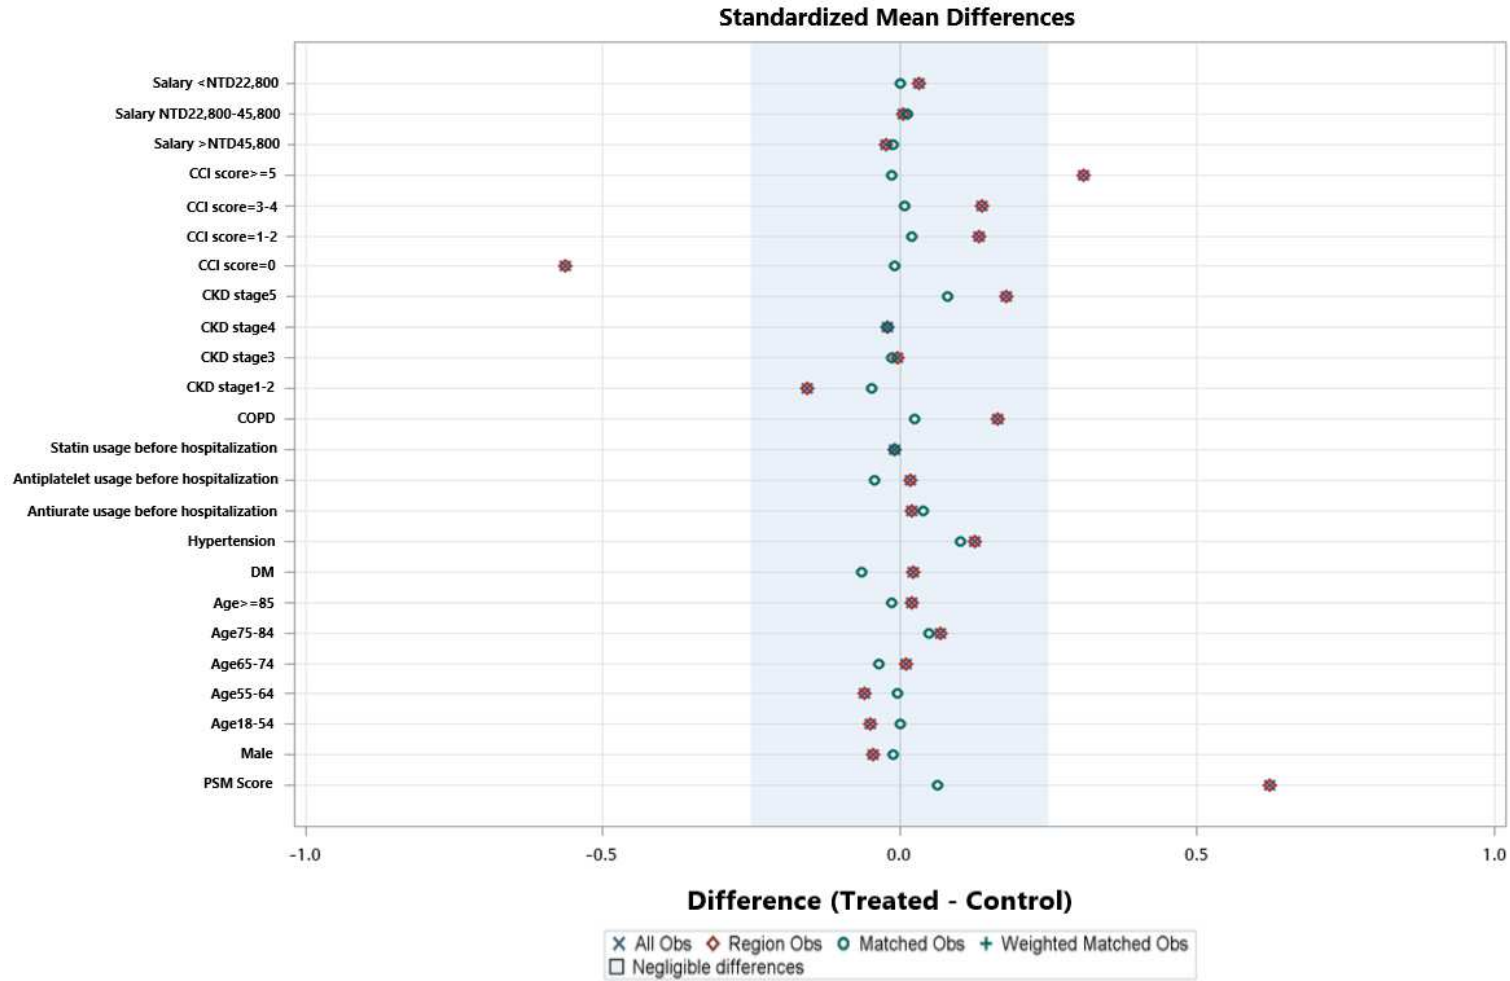

(B)

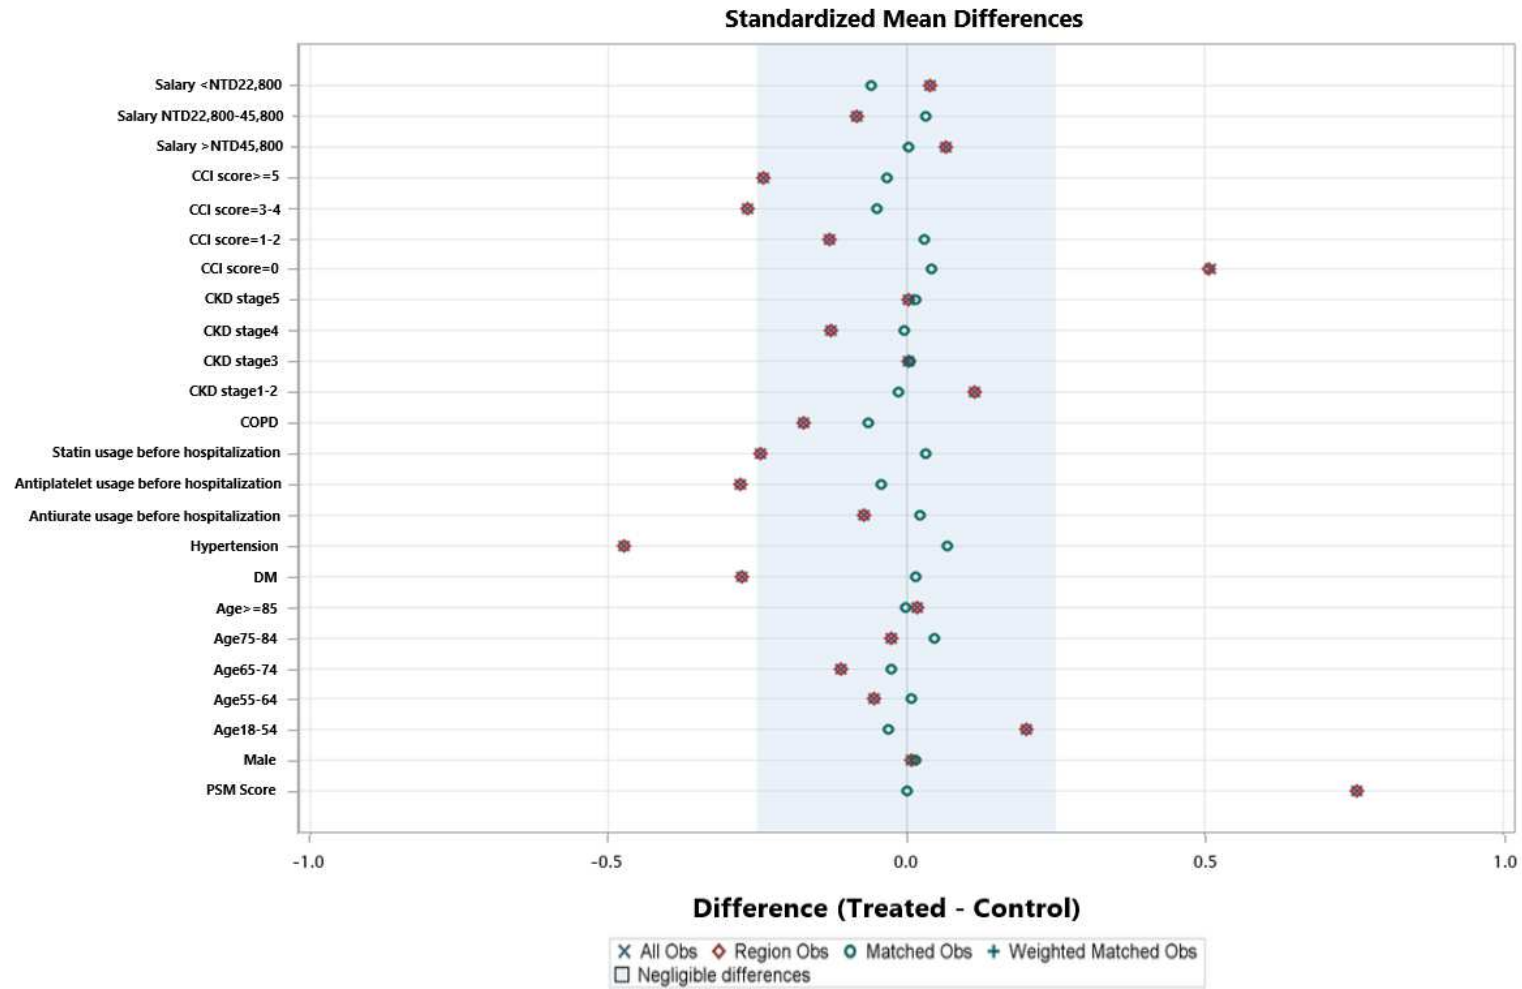

Supplement: Image1.pdf [file Image1.pdf]
